# Supplementary material
Source: PubMed Central journal article supplement (PMC4689337)
Supplement: 10.1194_M061697_jlr.M061697-1.pdf [file 10.1194_M061697_jlr.M061697-1.pdf]

**Supplementary Figure S1. Correlation matrix of eicosanoids.** The scale indicates Pearson correlation coefficients on log-transformed data. Dark and light indicate positive and negative correlations, respectively. All 28 quantifiable metabolites are listed. Analyses revealed that eicosanoids within the same pathway (by class and substrate) tend to be positively correlated (white borders indicate strongest clusters). DHET, dihydroxyeicosatrienoic acid; DHOME, dihydroxyoctadecaenoic acid; DiHDPA, dihydroxydocosapentaenoic acid; DiHETE, dihydroxytetraenoic acid; EET, epoxyeicosatrienoic acid; EpDPE, epoxydocosapentaenoic acid; EpOME, epoxyoctadecaenoic acid; HETE, hydroxyeicosatetraenoic acid; HODE, hydroxyoctadecadienoic acids; PGF1 $\alpha$ , prostaglandin F1alpha; PGF2 $\alpha$ , prostaglandin F2alpha; TriHOME, trihydroxyoctadecenoic acid

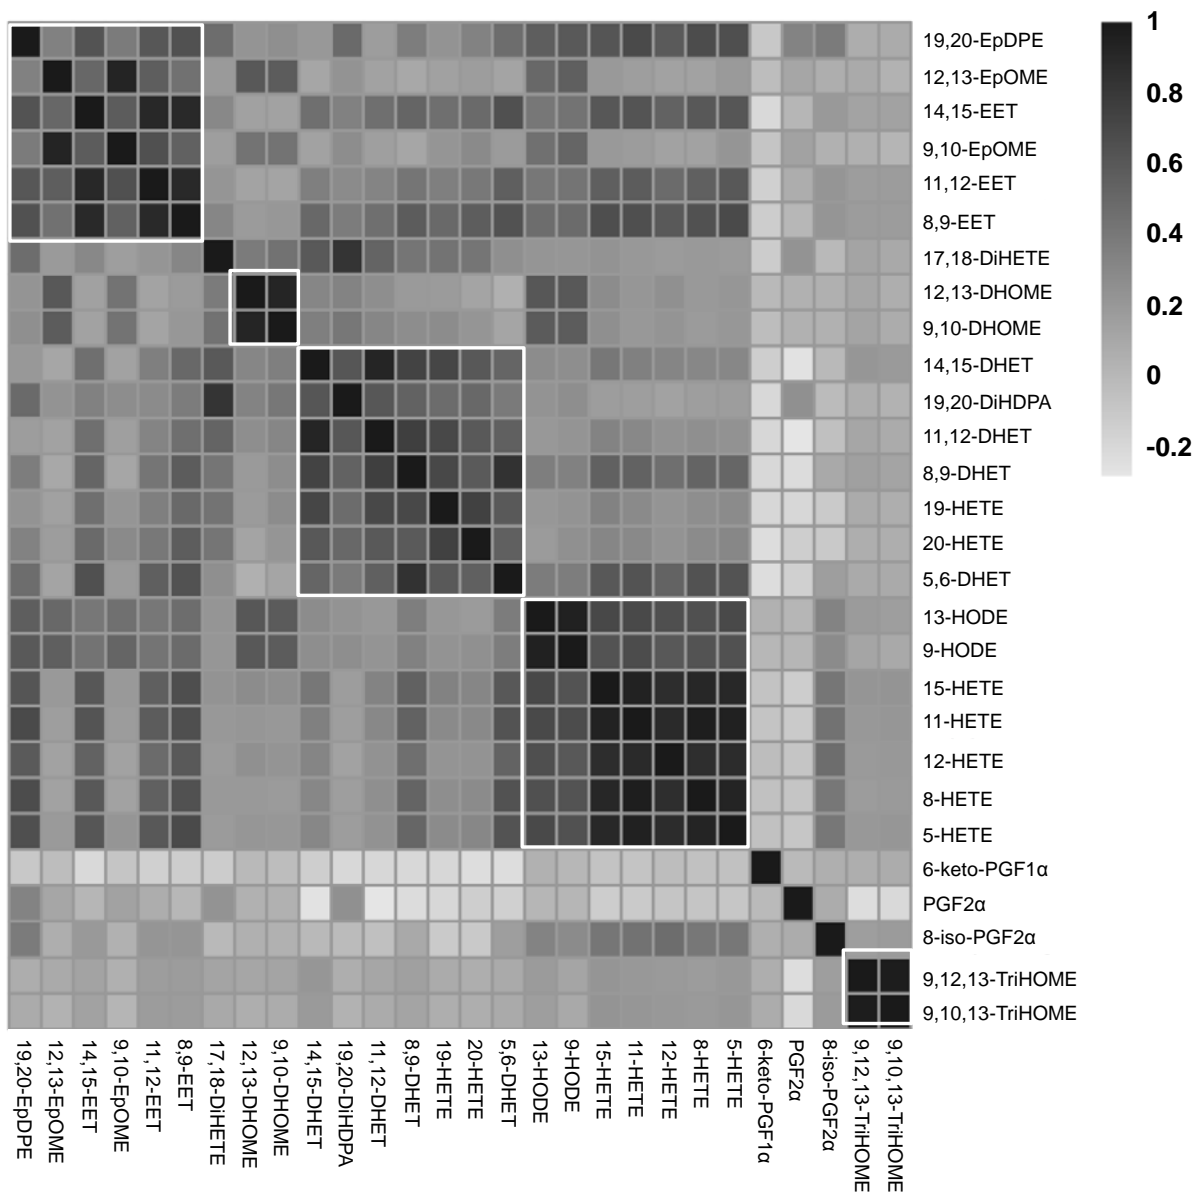

**Supplementary Figure S2. Expression of *CYP2J2* and *EPHX2* in peripheral blood mononuclear cells (PBMCs) across coronary artery disease (CAD) extent.**

(a) mRNA levels of the cytochrome P450 epoxygenase *CYP2J2* in PBMCs were associated with CAD extent across no apparent CAD (N=30), nonobstructive CAD (N=30), and obstructive CAD (N=38) patients (ANOVA P=0.042). (b) In contrast, expression of the gene that encodes soluble epoxide hydrolase (*EPHX2*) was not associated with CAD extent (ANOVA P=0.320). Gene expression was normalized to *GAPDH* using the  $2^{-\Delta Ct}$  method and log-transformed prior to analysis. Data presented as median (midline), interquartile range (box), and 95% confidence intervals (whiskers). \*P<0.05 in unadjusted post-hoc pairwise comparisons using Fisher's LSD test.

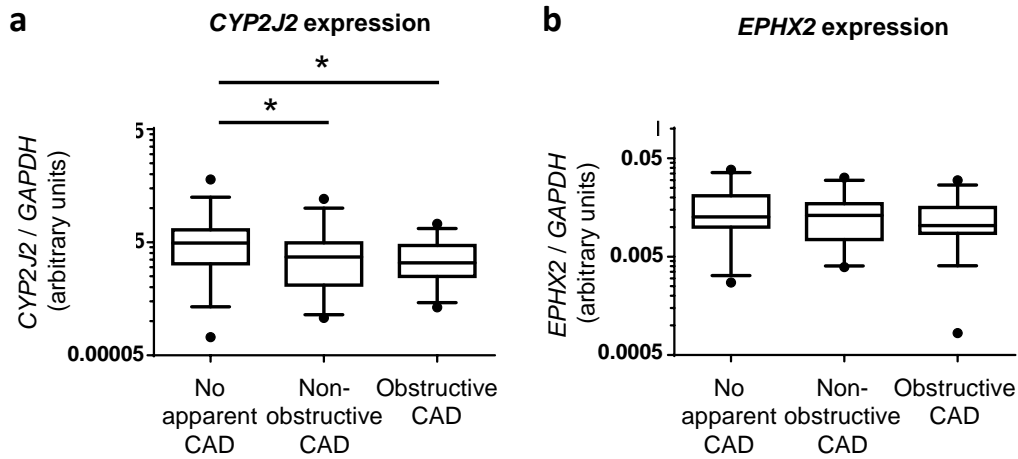

**Supplementary Table S1.** Median free plasma concentrations of eicosanoid metabolites

| Pathway                 | Analyte              | Plasma Concentration (pg/mL) |
|-------------------------|----------------------|------------------------------|
| AA – CYP epoxides       | 14,15-EET            | 299 (139)                    |
|                         | 11,12-EET            | 163 (86)                     |
|                         | 8,9-EET              | 197 (94)                     |
|                         | 5,6-EET*             | <LLOQ                        |
| AA – sEH diols          | 14,15-DHET           | 937 (433)                    |
|                         | 11,12-DHET           | 594 (322)                    |
|                         | 8,9-DHET             | 244 (150)                    |
|                         | 5,6-DHET             | 253 (160)                    |
| AA – CYP hydroxyls      | 20-HETE              | 1,188 (762)                  |
|                         | 19-HETE              | 646 (348)                    |
| AA – LOX metabolites    | 15-HETE              | 937 (503)                    |
|                         | 12-HETE              | 63 (42)                      |
|                         | 11-HETE              | 5,706 (3,600)                |
|                         | 8-HETE               | 12,628 (6,656)               |
|                         | 5-HETE               | 2,243 (1,759)                |
| AA – COX metabolites    | 8-iso-PGF2 $\alpha$  | 29 (12)                      |
|                         | 6-keto-PGF1 $\alpha$ | 51 (21)                      |
|                         | PGB2*                | <LLOQ                        |
|                         | PGD2*                | <LLOQ                        |
|                         | PGE2*                | <LLOQ                        |
|                         | PGF2 $\alpha$        | 238 (712)                    |
|                         | TXB2*                | <LLOQ                        |
| LA – LOX metabolites    | 13-HODE              | 21,356 (11,200)              |
|                         | 9-HODE               | 15,222 (9,844)               |
|                         | 9,12,13-TriHOME      | 688 (798)                    |
|                         | 9,10,13-TriHOME      | 9,150 (12,200)               |
| LA – CYP epoxides       | 12,13-EpOME          | 1,714 (1,000)                |
|                         | 9,10-EpOME           | 4,200 (2,867)                |
| LA – sEH diols          | 12,13-DHOME          | 2,809 (1,881)                |
|                         | 9,10-DHOME           | 1,742 (1,274)                |
| EPA/DHA – epoxide/diols | 19,20-DiHDPA         | 1,193 (706)                  |
|                         | 17,18-DiHETE         | 2,794 (1,937)                |
|                         | 19,20-EpDPE          | 1,659 (1,019)                |
|                         | 17,18-EpETE*         | <LLOQ                        |

AA, arachidonic acid; COX, cyclooxygenase; CYP, cytochrome P450; DHA, docosahexaenoic acid; DHET, dihydroxyeicosatrienoic acid; DHOME, dihydroxyoctadecaenoic acid; DiHDPA, dihydroxydocosapentaenoic acid; DiHETE, dihydroxytetraenoic acid; EET, epoxyeicosatrienoic acid; EPA, eicosapentaenoic acid; EpDPE, epoxydocosapentaenoic acid; EpETE, epoxyeicosatetraenoic acid; EpOME, epoxyoctadecaenoic acid; HETE, hydroxyeicosatetraenoic acid; HODE, hydroxyoctadecadienoic acids; LA, linoleic acid; LOX, lipoxygenase; PGB2, prostaglandin B2; PGD2, prostaglandin D2; PGE2, prostaglandin E2; PGF1 $\alpha$ , prostaglandin F1alpha; PGF2 $\alpha$ , prostaglandin F2alpha; sEH, soluble epoxide hydrolase; TriHOME, trihydroxyoctadecenoic acid; TXB2, thromboxane B2.

Data presented as median (interquartile range).

\*Analytes with >50% of the values falling below lower limit of quantification (LLOQ) were not included
